# Supplementary material for: Altered Vaginal Microbiota Composition Correlates With Human Papillomavirus and Mucosal Immune Responses in Women With Symptomatic Cervical Ectopy
Source: PubMed Central journal article supplement (PMC9152460; doi:10.3389/fcimb.2022.884272), 2022-05-17
Supplement: Image_1.pdf [file Image_1.pdf]

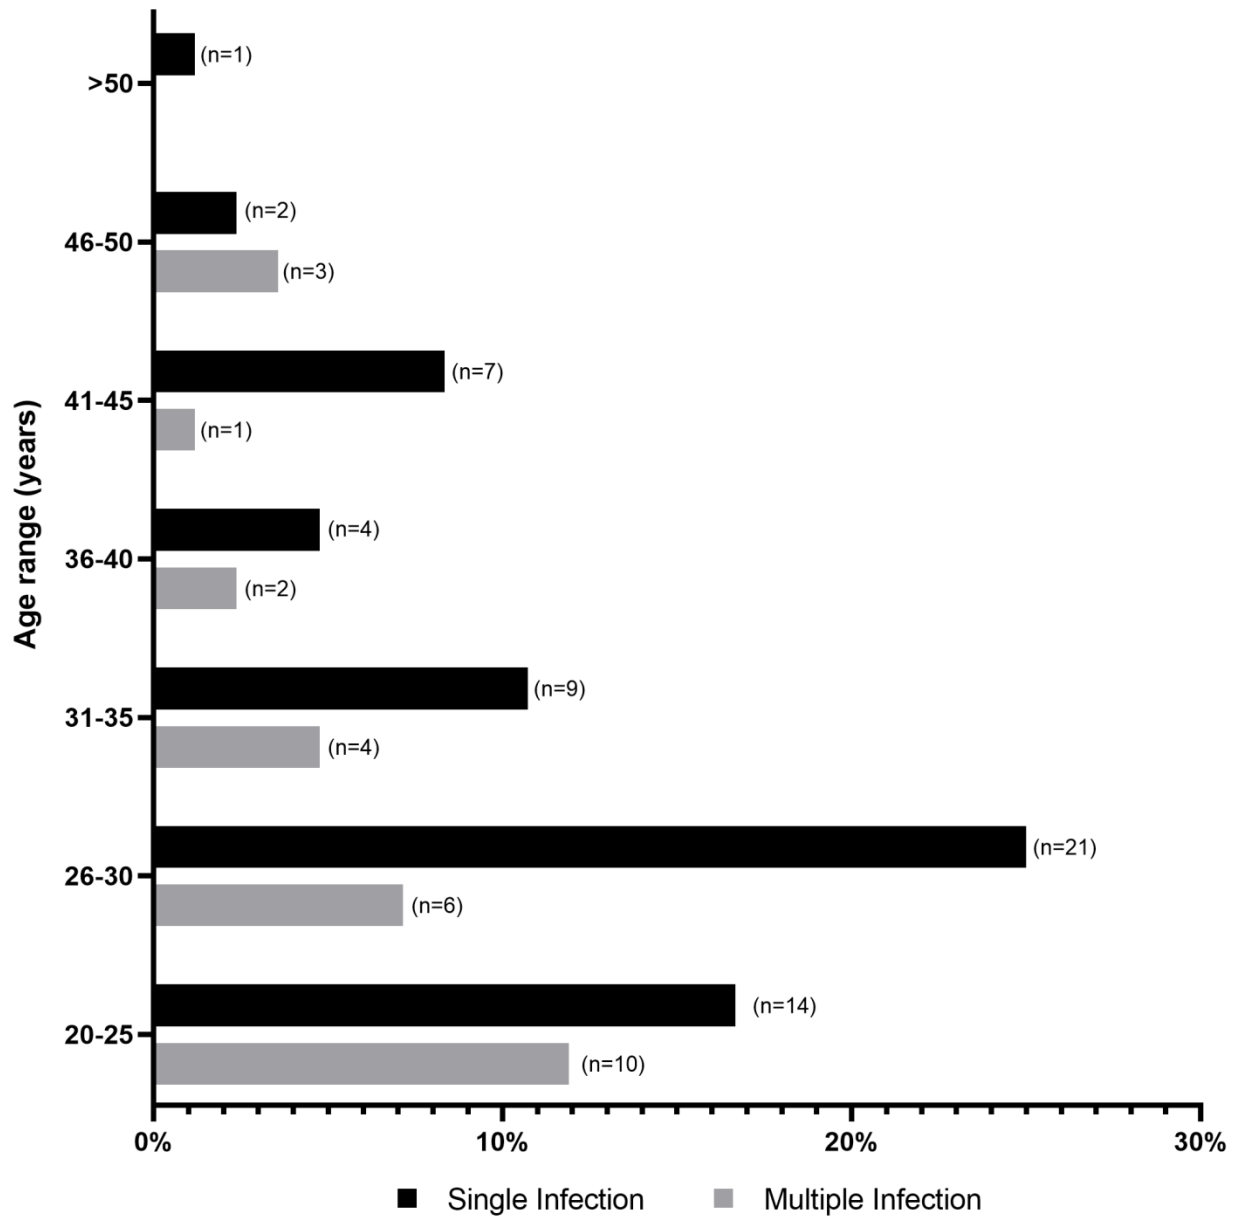

**Supplementary Figure 1.** Histogram showing the prevalence of human papillomavirus infection by age range.
