# Supplementary material for: Altered Vaginal Microbiota Composition Correlates With Human Papillomavirus and Mucosal Immune Responses in Women With Symptomatic Cervical Ectopy
Source: PubMed Central journal article supplement (PMC9152460; doi:10.3389/fcimb.2022.884272), 2022-05-17
Supplement: Image_3.pdf [file Image_3.pdf]

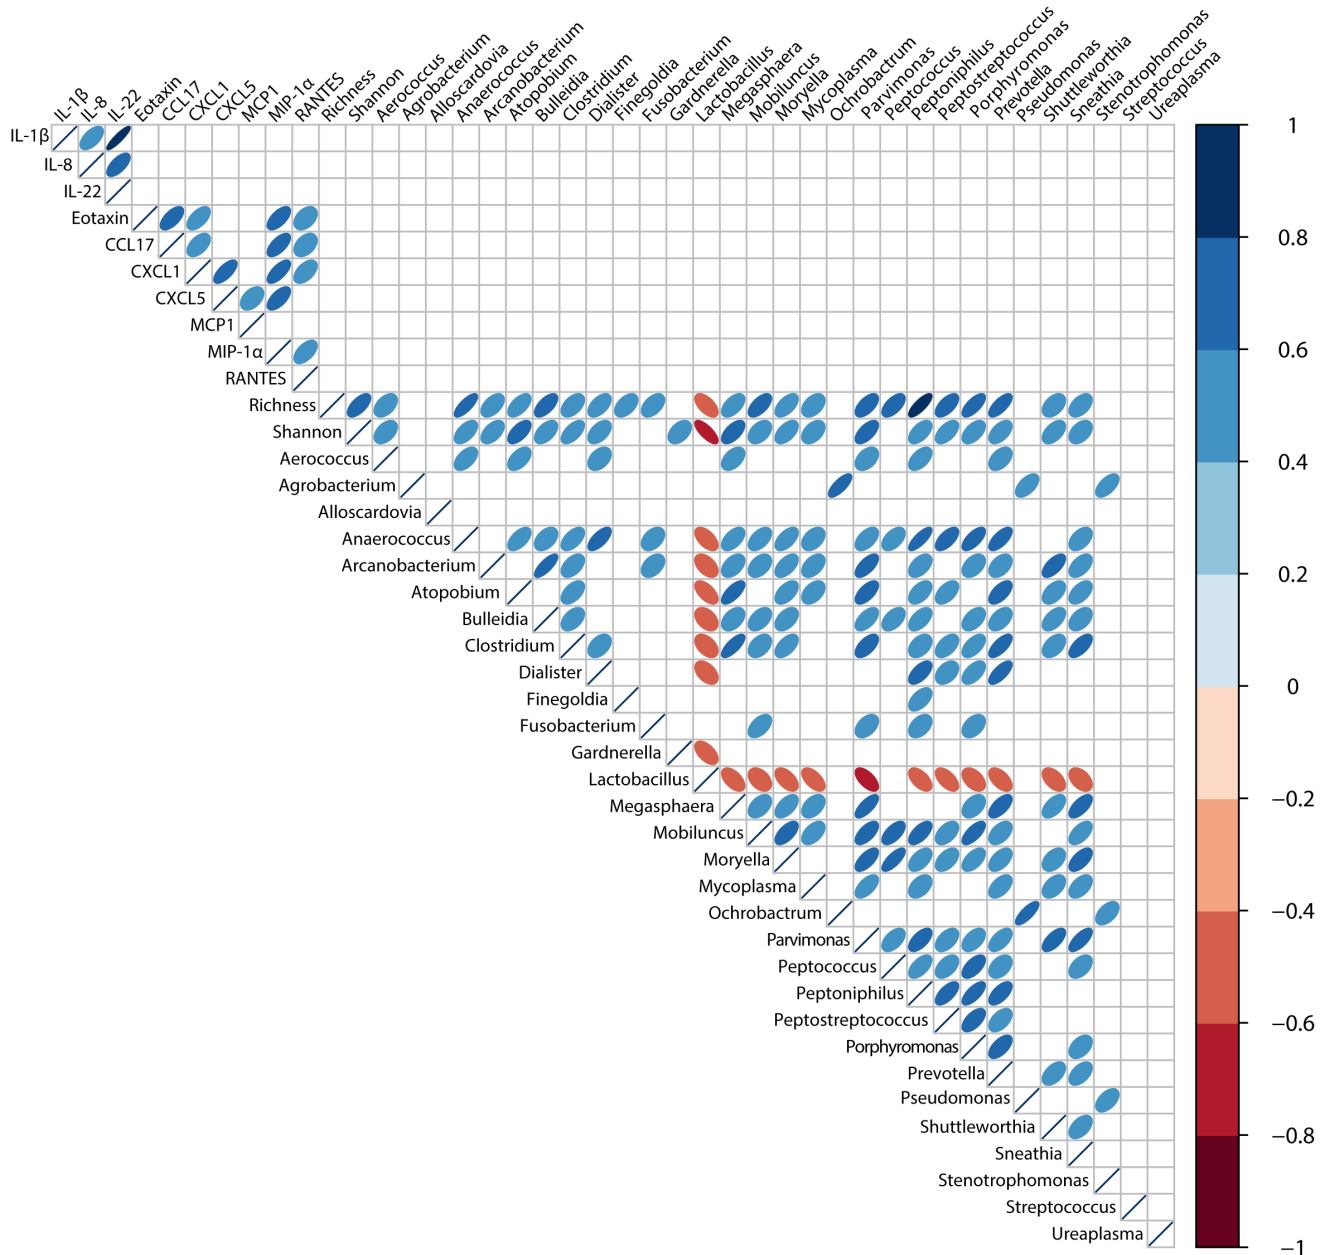

**Supplementary Figure 3.** Correlations between the vaginal microbiota and genital inflammation in women with symptomatic cervical ectopy. Correlations were computed using Spearman test, and visualized using corrplot. Only  $p$  values  $< 0.01$  are shown. Positive rho values are shown in blue, negative rho values shown in red, the intensity of the color is proportional to the strength of the rho value.
